# Supplementary material for: Theoretical investigation on the hydrogen evolution reaction mechanism at MoS2 heterostructures: the essential role of the 1T/2H phase interface
Source: Royal Society of Chemistry journal article supplement (doi:10.1039/c9cy01901d), 2019-11-27
Supplement: c9cy01901d1.pdf [file c9cy01901d1.pdf]

## Supporting Information

### Theoretical Investigation on Hydrogen Evolution Reaction Mechanism at MoS<sub>2</sub> Heterostructure: The Essential Role of 1T/2H Phase Interface

Tian Zhang<sup>a,†</sup>, Houyu Zhu<sup>a,†</sup>, Chen Guo<sup>b</sup>, Shoufu Cao<sup>a</sup>, Chi-Man Lawrence Wu<sup>b\*</sup>, Zhaojie Wang<sup>a</sup>,  
Xiaoqing Lu<sup>a\*</sup>

<sup>a</sup>School of Materials Science and Engineering, China University of Petroleum, Qingdao, Shandong  
266580, P. R. China

<sup>b</sup>Department of Materials Science and Engineering, City University of Hong Kong, Hong Kong SAR, P. R.  
China

\*Corresponding authors: Chi-Man Lawrence Wu, Xiaoqing Lu

E-mail address: lawrence.wu@cityu.edu.hk, luxq@upc.edu.cn

†These authors have made an equal contribution to this work.

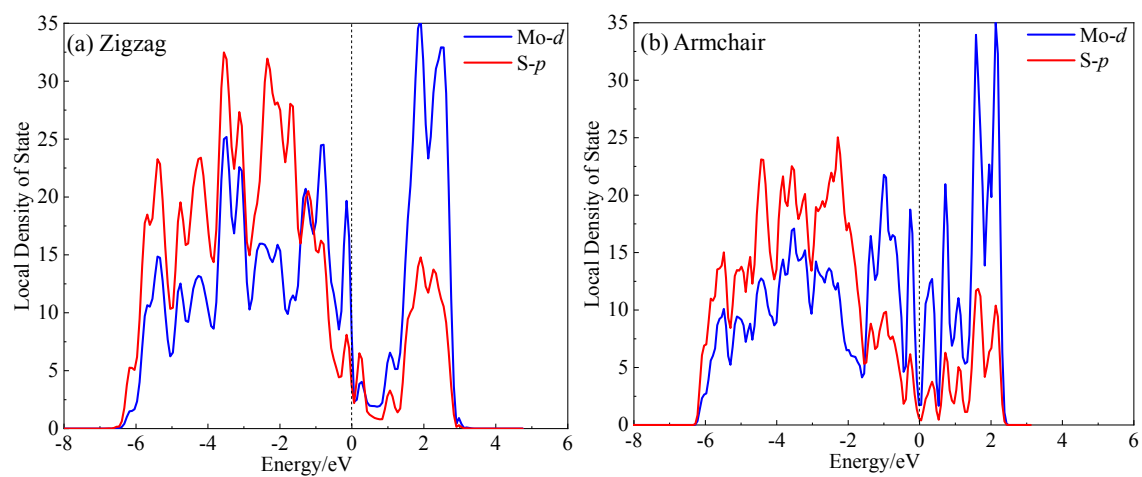

Figure S1. Density of states for the “Zigzag” (a) and “Armchair” (b) interfaces, projected on the *d*-orbitals of Mo and *p*-orbitals of S.

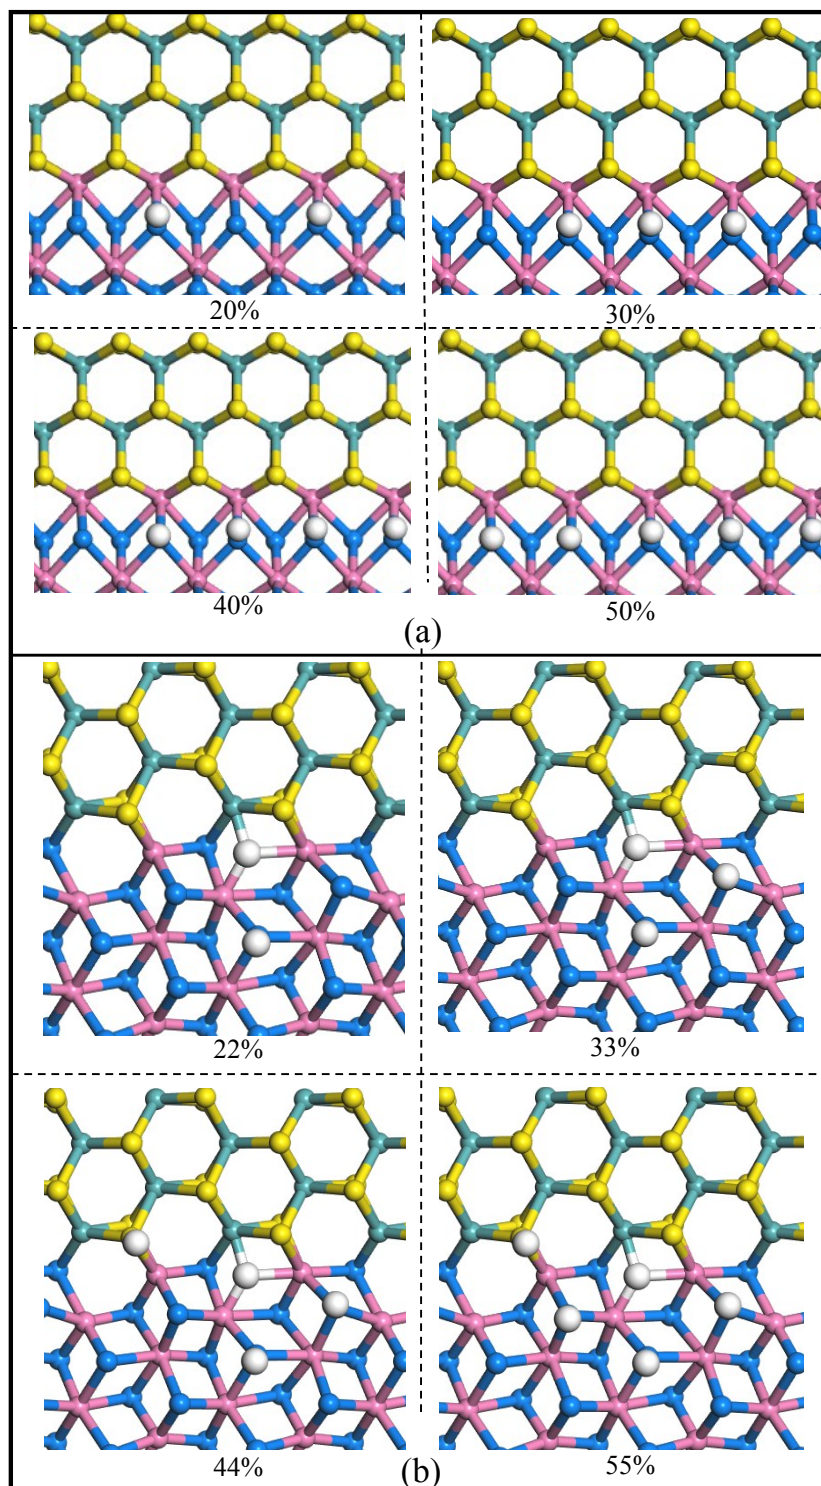

Figure S2. The H adsorption geometries at "Zigzag" (a) and "Armchair" (b) interfaces under different H coverages.

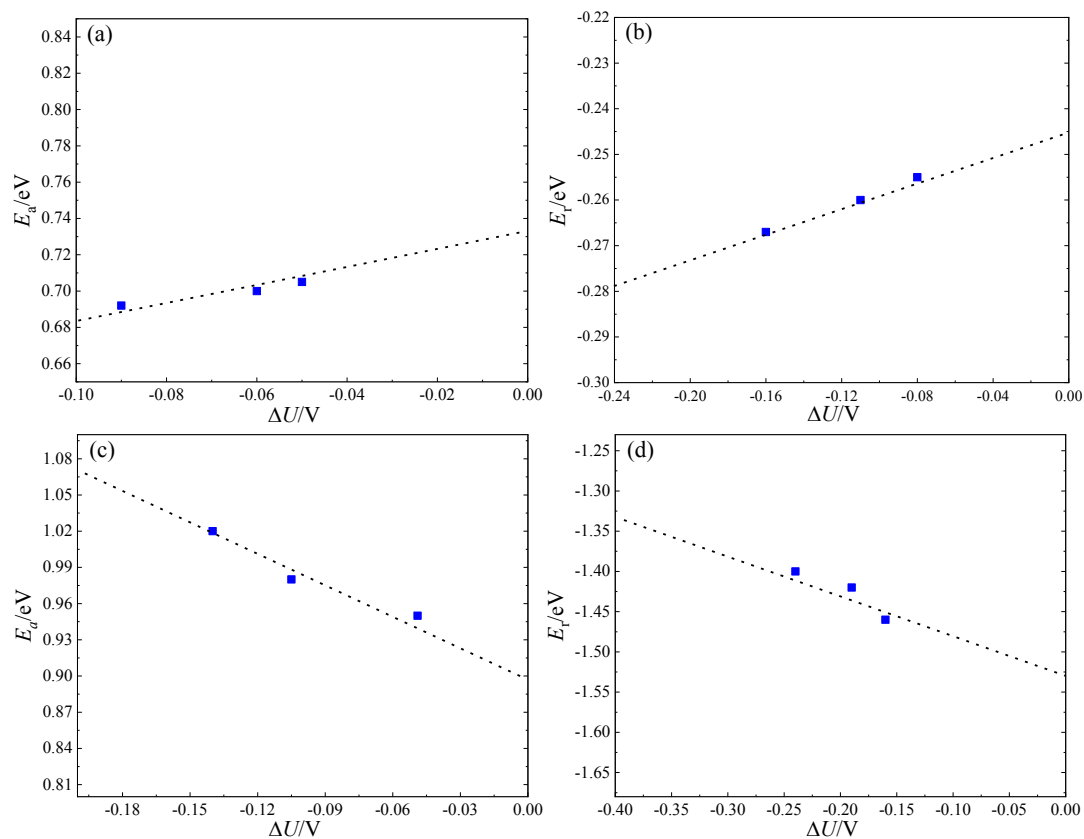

Figure S3. (a) Energy barrier ( $E_a$ ) and (b) reaction energy ( $E_r$ ) for the Volmer reaction, (c)  $E_a$  and (d)  $E_r$  for the Heyrovsky reaction as a function of the change in electrode potential  $\Delta U$  at the “ZigZag” interface. For the three data points from left to right, the interfacial H coverages in the initial states are 10%, 20% and 30%, respectively.

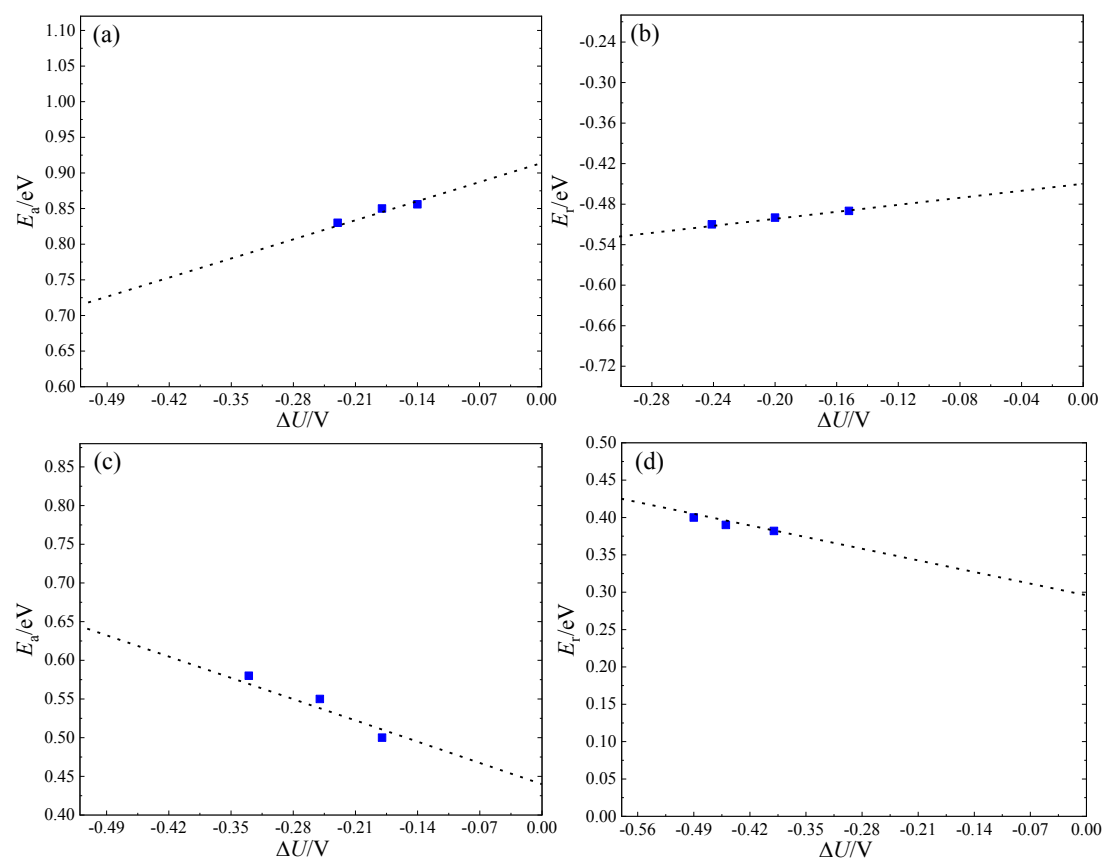

Figure S4. (a)  $E_a$  and (b)  $E_r$  for the Volmer reaction, (c)  $E_a$  and (d)  $E_r$  for the Heyrovsky reaction as a function of the change in electrode potential  $\Delta U$  at the “Armchair” interface. For the three data points from left to right, the interfacial H coverages in the initial states are 11%, 22% and 33%, respectively.

Table S1. The interfacial H adsorption energies ( $\Delta G_H$ , eV) at 2H phase.

| Interface | H-coverage | $\Delta G_H$ , eV |
|-----------|------------|-------------------|
| Zigzag    | 10%        | 0.47              |
|           |            | 0.64              |
|           |            | 0.77              |
|           | 20%        | 0.57              |
|           |            | 0.66              |
|           |            | 0.87              |
| Armchair  | 11%        | 0.60              |
|           |            | 0.72              |
|           |            | 0.78              |
|           | 22%        | 0.64              |
|           |            | 0.72              |
|           |            | 0.78              |

Table S2. Free energies ( $\Delta G_H$ , eV) of H adsorption at the doped “Zigzag” interface.

| Dopant | Site | $\Delta G_H$ |
|--------|------|--------------|
| Co     | I    | 0.59         |
|        | II   | -0.37        |
| Fe     | I    | 1.23         |
|        | II   | 0.74         |
| Ni     | I    | 0.60         |
|        | II   | -0.03        |
| Zn     | I    | 0.68         |
|        | II   | 0.58         |
| O      | O-H* | -0.94        |
|        | I    | 0.23         |
|        | II   | 0.78         |
| N      | N-H* | -1.46        |
|        | I    | 0.05         |
|        | II   | 0.60         |
| P      | P-H* | -0.77        |
|        | I    | 0.27         |
|        | II   | 0.87         |
